# Supplementary material for: Dietary Supplementation of a New Probiotic Compound Improves the Growth Performance and Health of Broilers by Altering the Composition of Cecal Microflora
Source: MDPI journal article supplement (doi:10.3390/biology11050633), 2022-04-21
Supplement: s1 [file s1]

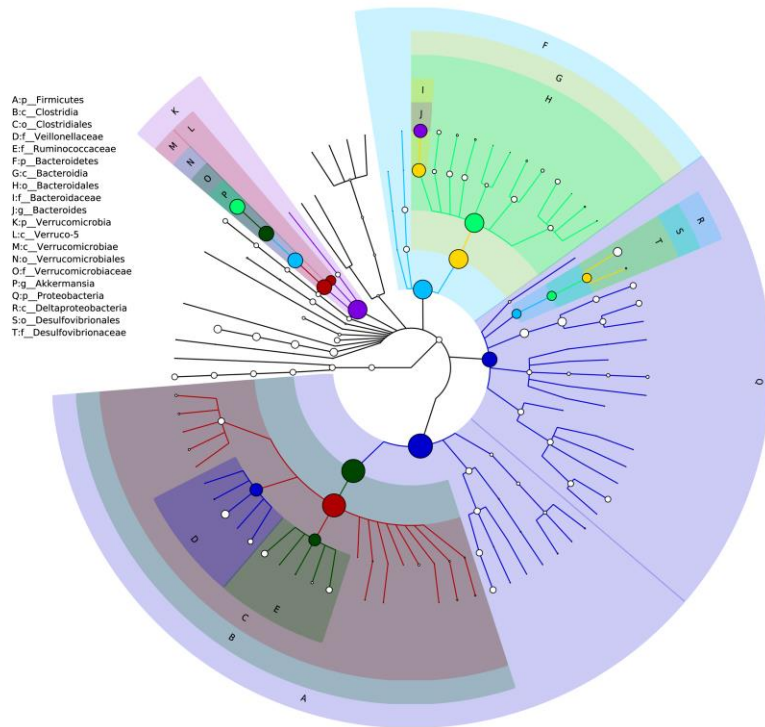

**Figure S1.** Linear discriminant analysis effect size (LEfSE) identified the most differentially abundant taxa enriched in cecal microbiota of broilers

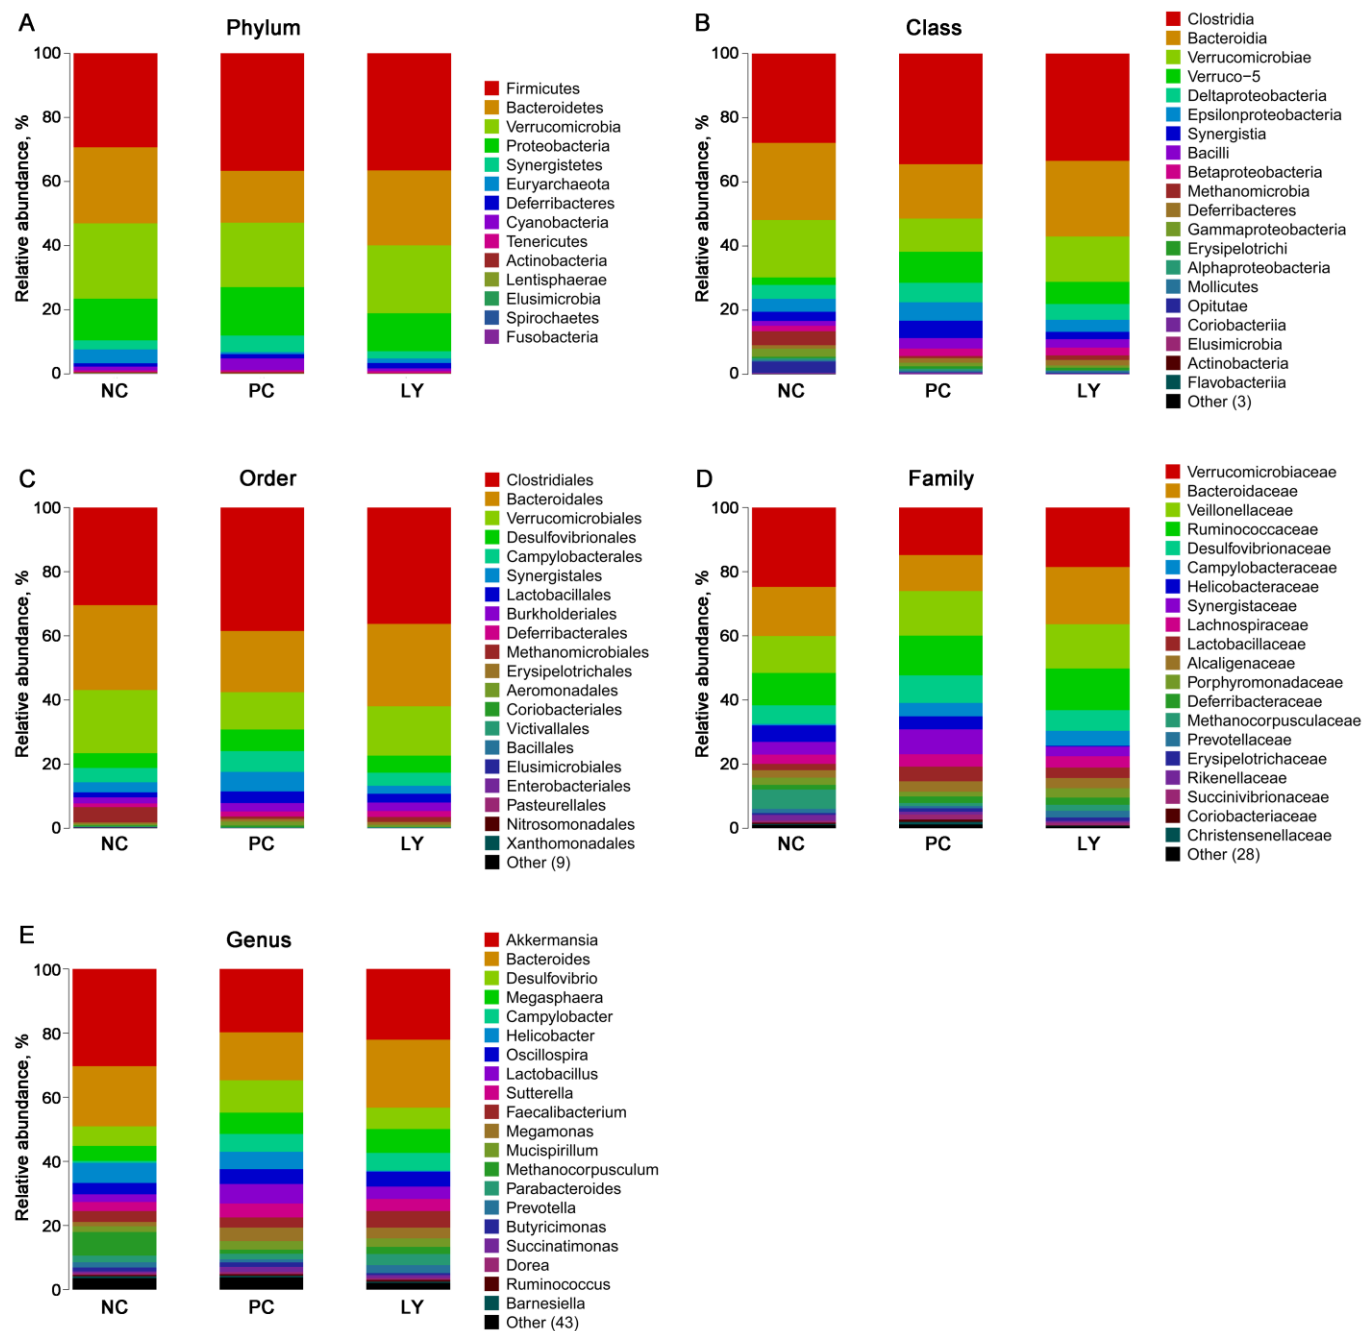

**Figure S2.** Bacterial community compositions of cecal microbiota of broilers at phylum (A), class (B), order (C), family (D) and genus (E) level.
